# Supplementary material
Source: publisher figshare collection journal article supplement (https://gsapubs.figshare.com/ndownloader/files/23293262)
Supplement: Supplementary file 1 [file 23293262]

Parra et al.,

## **Detecting earliest shortening and deformation advance in thrust-belt hinterlands: Example from the Colombian Andes**

### **1. Fission Track analyses**

Apatite preparation was done by Apatite to Zircon Inc. Apatite grains were concentrated following conventional heavy liquids and magnetic separation procedures. Apatite grains were then immersed in an epoxy resin and cured at 90°C for 1 h. After grinding and polishing to expose internal surfaces, the apatites in the first mount were etched in 5.5 HNO<sub>3</sub> for 20.0 s (±0.5 s) at 21°C (±1°C) to reveal spontaneous tracks. Analytical procedures followed the external detector method (Gleadow, 1981). Samples were irradiated at the Oregon State University research reactor. Following irradiation, induced tracks were etched with 40% hydrofluoric acid at 21°C for 45 min. Fission tracks were counted at the University of Potsdam using 1250 X magnification (dry objective) in a Leica DMRM microscope with drawing tube located above a digitizing tablet, and a Kinetec<sup>TM</sup> computer-controlled stage driven by the FTStage program (Dumitru, 1993). Ages and errors were calculated using the zeta calibration method (Hurford and Green, 1983) with the software Trackkey (Dunkl, 2002), and are reported at the 1s level. A zeta calibration factor of  $350.7 \pm 6.0$  for apatite (CN5 glass; M.Parra) was used for age calculations.

In samples with sufficient apatite yield, a second mount of grains was prepared. The grain mounts were then irradiated with approximately  $10^7$  tracks/cm<sup>2</sup> fission fragments from a 50 µCi (activity as of July, 1996) <sup>252</sup>Cf source in a vacuum chamber in order to enhance the number of confined tracks available for measurement (e.g., Donelick and Miller, 1991; Donelick et al., 2005). Irradiated grain mounts were then re-immersed in 5.5N HNO<sub>3</sub> for 20.0 seconds (± 0.5 seconds) at 21 °C (± 1°C) to reveal any horizontal, confined fission tracks, and the freshly-exposed confined tracks were then measured. Both track lengths and the angle to the c-axis were measured by M. Parra using unpolarized light. For each apatite grain from which fission-track age or length data were collected, an arithmetic mean value for the kinetic parameter Dpar (Donelick et al., 2005) was determined from 1 to 4 measurements.

Complete AFT results are presented in Table DR1.

### **2. Thermal Modeling**

The thermal histories for the two Cretaceous sedimentary rocks presented in Figure 4B were obtained through inverse modeling of apatite fission-track ages and lengths, and vitrinite reflectance data, using HeFTy v 1.6.7 (Ketcham, 2005). We modeled kinetically homogeneous populations [i.e, the grains that, having similar Dpar, yield a concordant age ( $P(\chi^2) > 5\%$ )] using c-axis projected track lengths (Ketcham et al., 2007a), and the apatite multicompositional kinetics model of Ketcham et al., 2007b). Maximum burial temperatures in the t-T paths were further constrained with available vitrinite reflectance measurements (Table DR2) according to the kinetic model of Burnham and Sweeney, 1989. Additional constraints (boxes delimiting the t-T space allowed for the thermal history) for thermal modeling were chosen so that t-T paths honor

the known geological history of the samples as follows: (1) a provenance constraint that allow residence at a wide range of temperatures before sediment accumulation; (2) a depositional constraint that enable permanence of the sample at surficial temperatures of 15-25°C during sediment accumulation; (3) a burial constraint allowing for a wide space for both, a potential early onset of cooling from temperatures hotter than that derived from the vitrinite reflectance data, and a broad range of subsequent cooling paths. We used two monotonic consistent half-segments between adjacent constraints using a gradual or intermediate randomizer style (Ketcham, 2005). A number of ~11000 to ~89000 models was run until 20 to 50 good fits (GOF>0.5, see Ketcham, 2005) were obtained. Input and output data for thermal models are presented in Table DR3.

### Figure Captions

**Figure DR1:** Composite reflection seismic line for the northern Middle Magdalena Valley (MV) basin (see Fig. 1 for location). Interpretation emphasizes the available well control, a regional, Late Cretaceous-Paleogene unconformity, and structural relationships below the unconformity.

**Figure DR2:** Blow-up of reflection seismic Line 4 in the northern Middle Magdalena Valley (MMV) basin (see Fig. 1 for location). Interpretation emphasizes the available well control, a regional unconformity, and structural relationships below the unconformity.

### References

- Burnham, A.K., and Sweeney, J.J., 1989, A chemical kinetic model of vitrinite maturation and reflectance: *Geochimica et Cosmochimica Acta*, v. 53, p. 2649-2657.
- Donelick, R., and Miller, D.S., 1991, Enhanced TINT fission track densities in low spontaneous track density apatites using  $^{252}\text{Cf}$ -derived fission fragment tracks. A model and experimental observations: *Nuclear Tracks and Radiation Measurements*, v. 18, p. 301-307.
- Donelick, R.A., O'Sullivan, P.B., and Ketcham, R.A., 2005, Apatite fission-track analysis, in Reiners, P.W., and Ehlers, T.A., eds., *Low Temperature Thermochronology: Techniques, Interpretations, and Applications*, Volume 58: *Reviews in Mineralogy and Geochemistry*, v. 58: Washington D.C., Mineralogical Society of America, p. 49-94.
- Dumitru, T.A., 1993, New computer-automated microscope stage system for fission-track analysis: *Nuclear Tracks and Radiation Measurements*, v. 21, p. 575-580.
- Dunkl, I., 2002, Trackkey: A windows program for calculation and graphical presentation of fission track data: *Computers and Geosciences*, v. 28, p. 3-12.
- Ecopetrol-ICP, 2003, *Madurez termal de unidades del Cretácico Superior en pozos del Valle Medio del Magdalena Piedecuesta*, Colombia, Instituto Colombiano del Petróleo-Ecopetrol.
- Galbraith, R.F., 1981, On statistical models for fission-track counts: *Mathematical Geology*, v. 13, p. 471-478.
- Gleadow, A.J.W., 1981, Fission-track dating methods: what are the real alternatives?: *Nuclear Tracks*, v. 5, p. 3-14.
- Gómez, E., 2001, *Tectonic controls on the Late Cretaceous to Cenozoic sedimentary fill of the Middle Magdalena Valley Basin, Eastern Cordillera and Llanos Basin, Colombia* [Ph.D thesis]: Ithaca, New York, Cornell University.

- Green, P.F., 1981, A new look at statistics in fission-track dating: *Nuclear Tracks*, v. 5, p. 77-86.
- Hurford, A.J., and Green, P.F., 1983, The zeta age calibration of fission-track dating: *Isotope Geoscience*, v. 1, p. 285-317.
- Ketcham, R.A., 2005, Forward and inverse modeling of low-temperature thermochronometry data, *in* Reiners, P. W., and Ehlers, T.A., eds., *Low Temperature Thermochronology: Techniques, Interpretations, and Applications*, Volume 58: *Reviews in Mineralogy and Geochemistry*, v. 58: Washington D.C, Mineralogical Society of America, p. 275-314.
- Ketcham, R.A., Carter, A., Donelick, R.A., Barbarand, J., and Hurford, A.J., 2007a, Improved measurement of fission-track annealing in apatite using c-axis projection: *Am. Mineral.*, v. 92, p. 789-798.
- Ketcham, R.A., Carter, A., Donelick, R. A., Barbarand, J., and Hurford, A.J., 2007b, Improved modeling of fission-track annealing in apatite: *Am. Mineral.*, v. 92, p. 799-810.
- Rangel, A., Moldowan, J.M., Niño, C., Parra, P., and Giraldo, B.N., 2002, Uniformation: Organic geochemical and stratigraphic assesment as cosource for Middle Magdalena basin oil, Colombia: *American Association of Petroleum Geologists Bulletin*, v. 86, p. 2069-2087.

TABLE DR1. APATITE FISSION-TRACK DATA

| ID #    | Sample Number | Long (W) | Lat (N) | Elev. (m) | Unit           | Strat position (km) <sup>†</sup> | Strat. Age (Ma) | # Gr | U (ppm) | Rho-S (NS) <sup>†</sup> | Rho-I (NI) <sup>†</sup> | Rho-D (ND) <sup>§</sup> | P( $\chi^2$ ) (%) <sup>#</sup> | Age (Ma) <sup>**</sup> | $\pm 1 \sigma$ error | Dpar (mm)          | Cl (%wt) | $\pm 1 \sigma$ | #  | Length ( $\mu$ m) | error ( $\mu$ m) | St dev ( $\mu$ m) | # length | Source <sup>††</sup> |
|---------|---------------|----------|---------|-----------|----------------|----------------------------------|-----------------|------|---------|-------------------------|-------------------------|-------------------------|--------------------------------|------------------------|----------------------|--------------------|----------|----------------|----|-------------------|------------------|-------------------|----------|----------------------|
| 660-15  | RS-SS30       | 73.414   | 7.107   | 194       | Esmeraldas Fm. | 3.00                             | 40 $\pm$ 5      | 9    | 30      | 15.96 (244)             | 29.62 (453)             | 11.28 (1707)            | 0%                             | <b>65.8</b>            | <b>30.1</b>          | N.D. <sup>§§</sup> | 0.13     | 0.18           | 9  | 11.18             | 0.53             | 1.67              | 10       | 1                    |
| 660-14  | RS-SS26       | 73.412   | 7.106   | 167       | Esmeraldas Fm. | 2.74                             | 40 $\pm$ 5      | 5    | 38      | 4.708 (32)              | 35.46 (241)             | 10.59 (1707)            | 8%                             | <b>27.6</b>            | <b>5.3</b>           | N.D.               | 0.34     | 0.38           | 5  | 10.24             | 2.07             | 5.07              | 6        | 1                    |
| 660-12  | RS-SS21       | 73.407   | 7.104   | 244       | Esmeraldas Fm. | 2.43                             | 40 $\pm$ 5      | 4    | 21      | 6.329 (47)              | 19.66 (146)             | 10.66 (1707)            | 2%                             | <b>73.5</b>            | <b>20.2</b>          | N.D.               | 0.53     | 0.68           | 4  | 9.74              | 0.74             | 2.85              | 15       | 1                    |
| 660-08  | RS-SS17       | 73.406   | 7.104   | 272       | La Paz Fm.     | 2.15                             | 51 $\pm$ 6      | 15   | 22      | 4.013 (125)             | 21.03 (655)             | 10.74 (1707)            | 0%                             | <b>40.3</b>            | <b>7.7</b>           | N.D.               | 0.59     | 0.58           | 15 | 11.62             | 0.32             | 1.07              | 11       | 1                    |
| 660-07  | RS-SS14       | 73.402   | 7.103   | 386       | La Paz Fm.     | 2.00                             | 51 $\pm$ 6      | 8    | 30      | 3.558 (45)              | 28.78 (364)             | 10.81 (1707)            | 97%                            | <b>26.2</b>            | <b>4.2</b>           | N.D.               | 0.59     | 0.58           | 8  | 8.94              | 1.36             | 2.71              | 4        | 1                    |
| 660-06  | RS-SS10       | 73.401   | 7.103   | 450       | La Paz Fm.     | 1.81                             | 51 $\pm$ 6      | 26   | 34      | 6.894 (318)             | 32.08 (1460)            | 10.89 (1707)            | 0%                             | <b>40.8</b>            | <b>5.1</b>           | N.D.               | 0.50     | 0.54           | 26 | 11.56             | 0.19             | 2.15              | 132      | 1                    |
| 660-05  | RS-SS08       | 73.395   | 7.100   | 315       | La Paz Fm.     | 1.31                             | 51 $\pm$ 6      | 4    | 12      | 1.30 (9)                | 11.12 (77)              | 10.96 (1707)            | 5%                             | <b>25.1</b>            | <b>8.9</b>           | N.D.               | 0.41     | 0.22           | 4  | N.A.              | N.A.             | N.A.              | 0        | 1                    |
| 660-04  | RS-SS05       | 73.394   | 7.099   | 299       | La Paz Fm.     | 1.20                             | 51 $\pm$ 6      | 28   | 19      | 3.86 (317)              | 18.22 (1496)            | 11.04 (1707)            | 1%                             | <b>45.5</b>            | <b>4.6</b>           | N.D.               | 0.53     | 0.50           | 28 | 10.52             | 0.24             | 2.58              | 118      | 1                    |
| 660-02  | RS-SS02       | 73.392   | 7.100   | 341       | Lisama Fm.     | 1.06                             | 61 $\pm$ 5      | 20   | 15      | 1.483 (87)              | 15.07 (884)             | 11.11 (1707)            | 1%                             | <b>22.3</b>            | <b>4.2</b>           | N.D.               | 0.40     | 0.54           | 20 | 9.85              | 0.46             | 2.10              | 21       | 1                    |
| 660-01  | RS-SS01       | 73.384   | 7.086   | 340       | Lisama Fm.     | 0.54                             | 61 $\pm$ 5      | 25   | 17      | 3.080 (216)             | 16.46 (1156)            | 11.19 (1707)            | 1%                             | <b>36.0</b>            | <b>5.3</b>           | N.D.               | 0.20     | 0.34           | 25 | 10.25             | 0.39             | 2.80              | 51       | 1                    |
| 1018-03 | RS 011409-1   | 73.327   | 7.217   | 407       | Lisama Fm.     | 0.25                             | 61 $\pm$ 5      | 3    | 14      | 6.02 (27)               | 15.386 (69)             | 11.941 (8201)           | 20%                            | <b>81.4</b>            | <b>18.6</b>          | 1.29               | N.D.     | 0.12           | 3  | N.A.              | N.A.             | N.A.              | 0        | 2                    |
| 1018-04 | BB 011309-    | 73.357   | 7.085   | 316       | Umir Fm.       | -0.52                            | 74 $\pm$ 9      | 20   | 15      | 4.326 (62)              | 15.56 (223)             | 12.08 (8201)            | 66%                            | <b>58.6</b>            | <b>8.5</b>           | 2.29               | N.D.     | 0.539          | 20 | 12.4              | 0.22             | 1.51              | 49       | 2                    |
| 660-37  | Umir-SS       | 73.350   | 7.078   | 291       | Umir Fm.       | -0.84                            | 74 $\pm$ 9      | 20   | 13      | 3.497 (169)             | 17.38 (840)             | 14.72 (2335)            | 44%                            | <b>56.1</b>            | <b>4.9</b>           | N.D.               | 1.22     | 0.59           | 20 | 12.73             | 0.40             | 1.91              | 23       | 1                    |
| 1018-05 | BB 011309-2   | 73.306   | 7.149   | 794       | La Luna Fm.    | -1.10                            | 85 $\pm$ 5      | 14   | 59      | 6.284 (68)              | 38.441 (416)            | 12.218 (8201)           | 32%                            | <b>34.9</b>            | <b>4.6</b>           | 1.657              | N.D.     | 0.375          | 12 | 10.084            | 1.23             | 2.466             | 4        | 2                    |
| 1018-06 | BB 011309-4   | 73.289   | 7.164   | 983       | Simiti Fm.     | -2.30                            | 106 $\pm$ 6     | 15   | 27      | 8.091 (198)             | 33.877 (829)            | 12.357 (8201)           | 23%                            | <b>51.5</b>            | <b>4.2</b>           | 1.38               | N.D.     | 0.18           | 14 | 12.11             | 0.26             | 1.65              | 39       | 2                    |
| 660-36  | Tablazo-1-SS  | 73.350   | 7.040   | 316       | Tablazo Fm.    | -2.42                            | 118 $\pm$ 6     | 21   | 27      | 11.40 (305)             | 35.60 (952)             | 14.88 (2335)            | 0%                             | <b>65.5</b>            | <b>17.1</b>          | N.D.               | 0.09     | 0.13           | 21 | 11.14             | 0.28             | 1.38              | 24       | 1                    |
| 1018-07 | BB 011309-7   | 73.281   | 7.179   | 1148      | Tablazo Fm.    | -2.60                            | 118 $\pm$ 6     | 21   | 27      | 5.331 (158)             | 26.486 (785)            | 12.495 (8201)           | 92%                            | <b>43.9</b>            | <b>3.9</b>           | 1.477              | N.D.     | 0.284          | 21 | N.A.              | N.A.             | N.A.              | 0        | 2                    |
| 1018-08 | BB 011309-9   | 73.276   | 7.145   | 1150      | Tambor Fm.     | -3.60                            | 138 $\pm$ 8     | 1    | 48      | 3.846 (3)               | 52.568 (41)             | 12.634 (8201)           | N.A. <sup>##</sup>             | <b>16.2</b>            | <b>6.9</b>           | 1.24               | N.D.     | N.A.           | 1  | N.A.              | N.A.             | N.A.              | 0        | 2                    |
| 1018-09 | BB 011309-    | 73.253   | 7.124   | 1115      | Giron Gr.      | -5.20                            | 161 $\pm$ 15    | 5    | 29      | 8.411 (41)              | 36.105 (176)            | 12.773 (8201)           | 2%                             | <b>60.4</b>            | <b>20.7</b>          | 1.68               | N.D.     | 0.84           | 5  | N.A.              | N.A.             | N.A.              | 0        | 2                    |
| 660-34  | Giron-SS      | 73.258   | 7.125   | 1125      | Giron Gr.      | -5.25                            | 161 $\pm$ 15    | 2    | 19      | 1.673 (6)               | 25.65 (92)              | 15.12 (1733)            | 63%                            | <b>18.7</b>            | <b>7.9</b>           | N.D.               | 0.36     | 0.14           | 2  | N.A.              | N.A.             | N.A.              | 0        | 1                    |
| 1018-10 | BB 011309-    | 73.192   | 7.104   | 1133      | Giron Gr.      | -7                               | 161 $\pm$ 15    | 2    | 34      | 9.402 (33)              | 50.146 (176)            | 12.911 (8201)           | 35%                            | <b>42.3</b>            | <b>8.1</b>           | 1.065              | N.D.     | 0.473          | 2  | N.A.              | N.A.             | N.A.              | 0        | 2                    |

\* Stratigraphic position of samples from the Eastern Cordillera with respect to a datum, chosen at the base of the Lisama Formation

† RhoS and Rho I are the spontaneous and induced tracks density measured, respectively ( $\times 10^5$  tracks/cm<sup>2</sup>). NS and NI are the number of spontaneous and induced tracks counted for estimating RhoS and

§ RhoD is the induced track density measured in the external mica detector attached to CN2 dosimetry glass ( $\times 10^5$  tracks/cm<sup>2</sup>). ND is the number of induced tracks counted in the mica for estimating RhoD.

# ( $\chi^2$ ) (%) is the chi-square probability (Galbraith, 1981; Green, 1981). Values greater than 5% are considered to pass this test and represent a single population of ages

\*\* Pooled (central) age reported for ages that pass (fail) the  $\chi^2$  test

†† 1. Gomez (2001) ; 2. This study

§§ N.D.: No data

## N.A.: Not applicable

TABLE DR2. VITRINITE REFLECTANCE DATA

| Sample Number     | Long (W) | Lat (N) | Unit           | Strat position (km) <sup>*</sup> | Ro (%) | S.D (%) | Source <sup>*</sup>      |
|-------------------|----------|---------|----------------|----------------------------------|--------|---------|--------------------------|
| RS-G26            | 73.348   | 7.234   | Esmeraldas Fm. | 2.50                             | 0.53   | 0.03    | Gomez, 2001              |
| RS-G13            | 73.340   | 7.232   | La Paz Fm.     | 1.75                             | 0.55   | 0.05    | Gomez, 2001              |
| RS-PL1            | 73.330   | 7.220   | Lisama Fm.     | 0.60                             | 0.48   | 0.05    | Gomez, 2003 <sup>1</sup> |
| N.D. <sup>†</sup> | 73.368   | 7.094   | Umir Fm.       | -0.30                            | 0.53   | 0.03    | Rangel et al., 2002      |
| CE-Umir           | 73.377   | 7.684   | Umir Fm.       | -0.80                            | 0.61   | 0.05    | Ecopetrol-ICP, 2003      |
| CE-Luna           | 73.377   | 7.149   | La Luna Fm.    | -1.20                            | 0.77   | 0.04    | Ecopetrol-ICP, 2003      |
| CE-Simiti         | 73.377   | 7.154   | Simiti Fm.     | -2.30                            | 0.82   | 0.06    | Ecopetrol-ICP, 2003      |

<sup>\*</sup> Stratigraphic position of samples from the Nuevo Mundo Sincline with respect to a datum,

<sup>†</sup> N.D.: No data

TABLE DR3. RESULTS OF APATITE FISSION-TRACK MODELING

| TABLE DR3. RESULTS OF APATITE FISSION-TRACK MODELING |                   |                           |        |               |                  |       |                          |    |                         |                               |                  |              |                 |                  |                       |
|------------------------------------------------------|-------------------|---------------------------|--------|---------------|------------------|-------|--------------------------|----|-------------------------|-------------------------------|------------------|--------------|-----------------|------------------|-----------------------|
| Sample                                               | Kinetic Age       |                           | Length |               |                  |       |                          |    | Vitrinite reflectance   |                               |                  |              |                 |                  |                       |
|                                                      | Cl<br>(wt%)       | Dpar<br>( $\mu\text{m}$ ) | N      | Model<br>(Ma) | Measured<br>(Ma) | GOF * | Old<br>(Ma) <sup>†</sup> | N  | Model ( $\mu\text{m}$ ) | Measured<br>( $\mu\text{m}$ ) | GOF <sup>*</sup> | Model<br>(%) | Measured<br>(%) | GOF <sup>*</sup> | Ro Model <sup>§</sup> |
| 1018-04                                              | N.D. <sup>#</sup> | 2.77                      | 20     | 57.8          | 58.6 $\pm$ 8.5   | 0.92  | 104.0                    | 50 | 13.60 $\pm$ 1.43        | 13.98 $\pm$ 0.94              | 0.79             | 0.70         | 0.70 $\pm$ 0.05 | 0.95             | Easy Ro%              |
| 1018-06                                              | N.D.              | 1.16                      | 15     | 50.4          | 51.6 $\pm$ 4.2   | 0.78  | 57.9                     | 39 | 14.11 $\pm$ 1.01        | 13.71 $\pm$ 1.14              | 0.48             | 0.79         | 0.70 $\pm$ 0.05 | 0.70             | Easy Ro%              |

\* GOF is the goodness of fit between measured and modeled data (Ketcham, 2005); A good fit has GOF>0.5; an acceptable fit has GOF>0.05

† Oldest track modeled

§ Vitrinite reflectance model employed for calibration between Ro value and temperature (see Ketcham, 2005)

# N.D.: No data

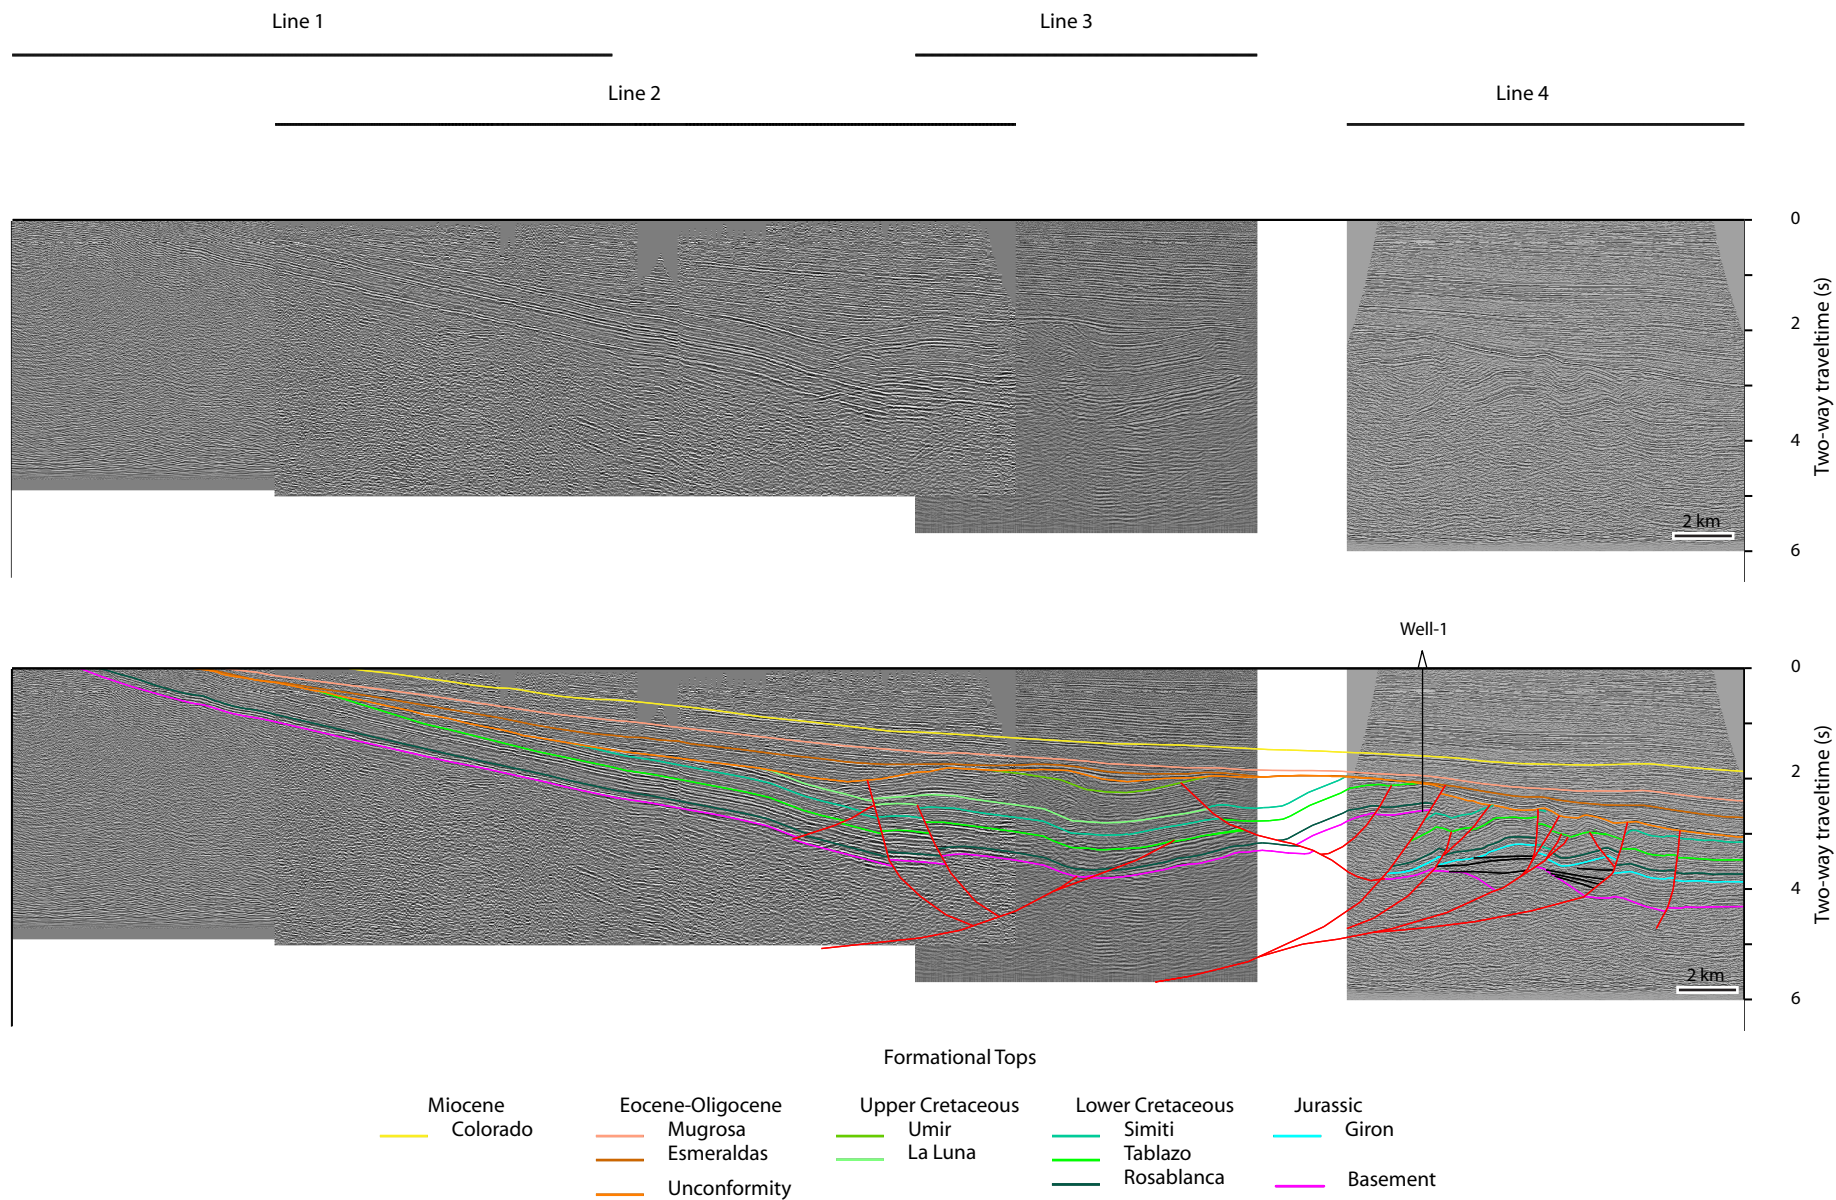

FigA1\_Parra.ai

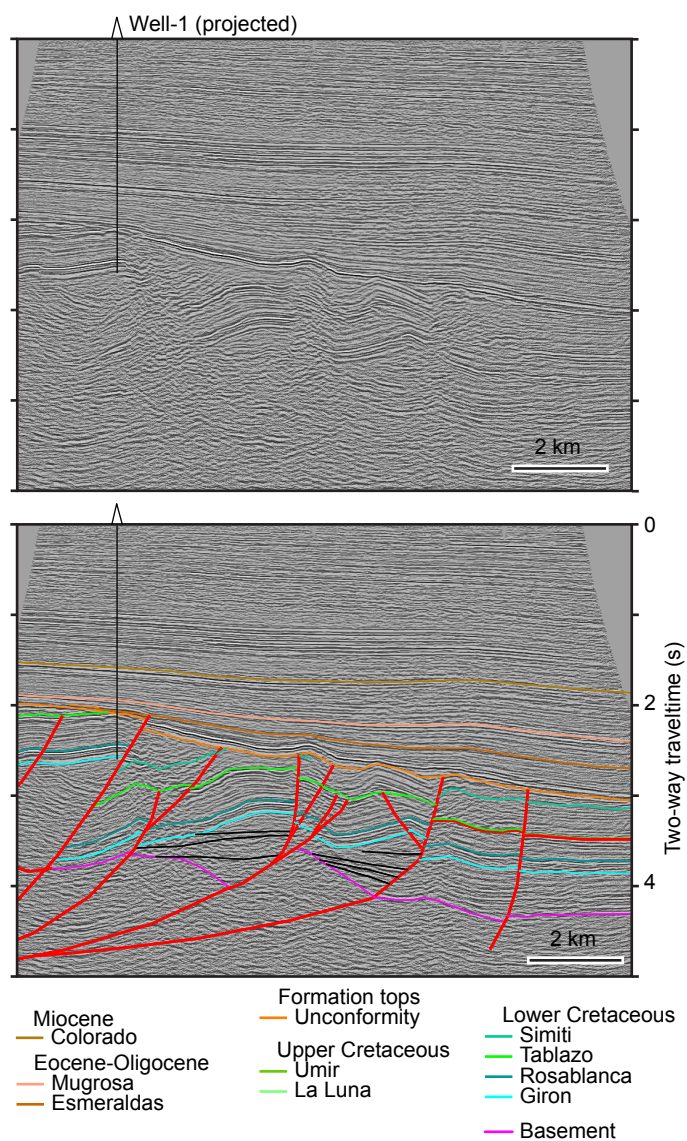

Fig 2\_Parra.ai
